# Supplementary material for: Intercomparison of atmospheric water vapour measurements in theCanadian high Arctic
Source: Copernicus journal article supplement (doi:10.5194/amt-2016-330), 2016-11-22
Supplement: Supplementary file 1 [file Figure S1 - high resolution version of Figure 14.pdf › Figure S1 - high resolution version of Figure 14.pdf]

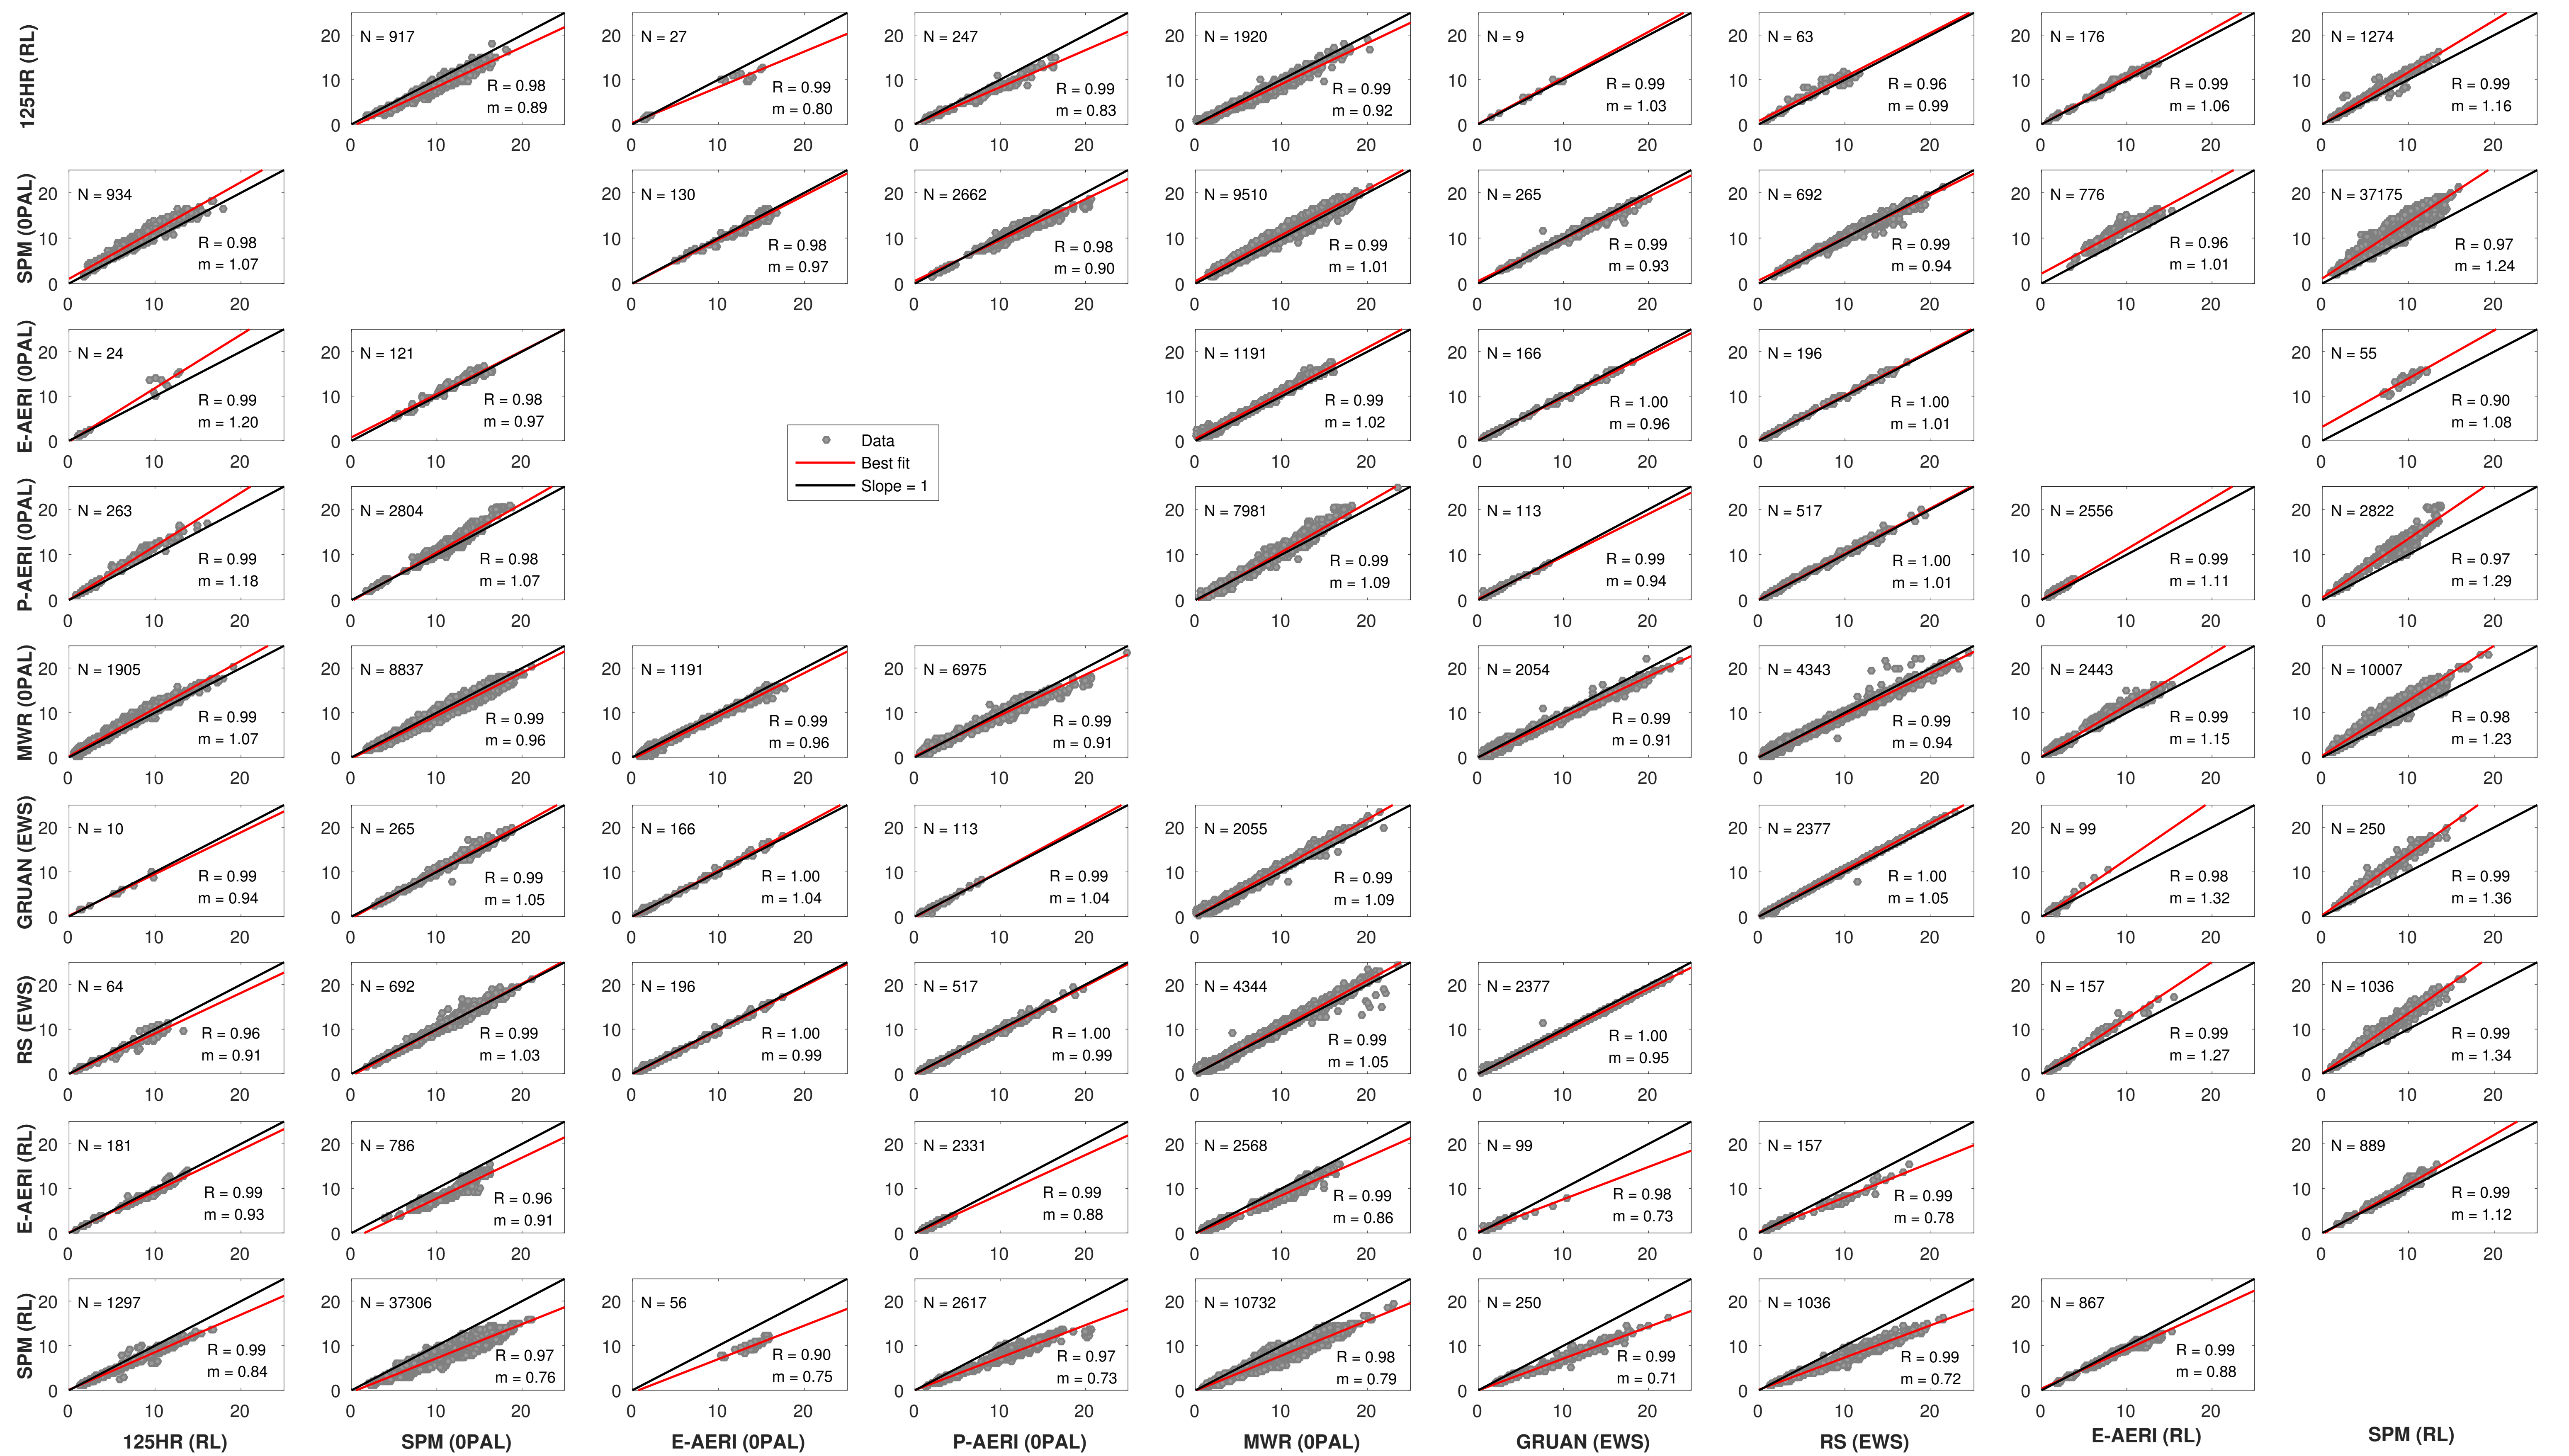

Figure S1: Same as Figure 14, but in full resolution. Water vapour total column (mm PWV) correlations between Eureka instruments.

Data used for the radiosonde and GRUAN comparisons with the 125HR have been smoothed with the MUSICA averaging kernels. Blank spaces indicate that no coincidences were available for that pair of instruments.
