# Supplementary material for: Intercomparison of atmospheric water vapour measurements in theCanadian high Arctic
Source: Copernicus journal article supplement (doi:10.5194/amt-2016-330), 2016-11-22
Supplement: Supplementary file 2 [file Table S1 - high resolution version of Table 4 - PWV comparison summary.pdf › Table S1 - high resolution version of Table 4 - PWV comparison summary.pdf]

Table S1: High resolution version of Table 4. Results of intercomparison of Eureka PWV measurements, including number of coincidences (N), correlation coefficient (R), slope of the correlation line (m), mean difference (X – Y) and standard deviation of the difference in mm, mean percent difference ( $2 * (X - Y) / (X + Y) * 100\%$ ) and standard deviation of the percent difference. The standard error of the mean (SE) is noted in brackets alongside the standard deviations. The x-axis instruments along the top are "X" in the difference equations; the y-axis instruments along the top are "Y" in the difference equations. Comparisons between 125HR and radiosonde and GRUAN datasets involve smoothing the radiosonde profile using MUSICA averaging kernels, and interpolation to the 125HR retrieval grid prior to integrating the total column.

|               | 125HR (RL)                                                                                  | SPM (0PAL)                                                                                 | E-AERI (0PAL)                                                                             | P-AERI (0PAL)                                                                             | MWR (0PAL)                                                                                  | GRUAN (EWS)                                                                               | RS (EWS)                                                                                  | E-AERI (RL)                                                                                 | SPM (RL)                                                                                     |               |
|---------------|---------------------------------------------------------------------------------------------|--------------------------------------------------------------------------------------------|-------------------------------------------------------------------------------------------|-------------------------------------------------------------------------------------------|---------------------------------------------------------------------------------------------|-------------------------------------------------------------------------------------------|-------------------------------------------------------------------------------------------|---------------------------------------------------------------------------------------------|----------------------------------------------------------------------------------------------|---------------|
| 125HR (RL)    |                                                                                             | N = 917<br>R = 0.98<br>m = 0.89<br>1.57 ± 0.72<br>mm (0.02)<br>18.46 ± 8.42<br>% (0.28)    | N = 27<br>R = 0.99<br>m = 0.80<br>1.08 ± 1.41<br>mm (0.27)<br>11.75 ± 11.42<br>% (2.20)   | N = 247<br>R = 0.99<br>m = 0.83<br>1.01 ± 0.91<br>mm (0.06)<br>16.36 ± 8.03<br>% (0.51)   | N = 1920<br>R = 0.99<br>m = 0.92<br>0.64 ± 0.63<br>mm (0.01)<br>11.60 ± 20.60<br>% (0.47)   | N = 9<br>R = 0.99<br>m = 1.03<br>-0.31 ± 0.42<br>mm (0.14)<br>-4.92 ± 1.64<br>% (1.64)    | N = 63<br>R = 0.96<br>m = 0.99<br>-0.69 ± 0.89<br>mm (0.11)<br>-11.65 ± 5.09<br>12.36 %   | N = 176<br>R = 0.99<br>m = 1.06<br>-0.42 ± 0.45<br>mm (0.03)<br>-5.14 ± 5.09<br>% (0.38)    | N = 1274<br>R = 0.99<br>m = 1.16<br>-1.05 ± 0.64<br>mm (0.02)<br>-15.14 ± 6.30<br>% (0.18)   | 125HR (RL)    |
| SPM (0PAL)    | N = 954<br>R = 0.98<br>m = 1.07<br>-1.57 ± 0.73<br>mm (0.02)<br>-18.50 ± 8.60<br>% (0.28)   |                                                                                            | N = 130<br>R = 0.98<br>m = 0.97<br>0.40 ± 0.65<br>mm (0.06)<br>3.35 ± 5.16 %<br>(0.45)    | N = 2662<br>R = 0.98<br>m = 0.90<br>0.54 ± 0.66<br>mm (0.01)<br>4.74 ± 4.96 %<br>(0.10)   | N = 9510<br>R = 0.99<br>m = 1.01<br>-0.67 ± 0.60<br>mm (0.01)<br>-7.67 ± 7.34<br>% (0.08)   | N = 265<br>R = 0.99<br>m = 0.93<br>-0.18 ± 0.67<br>mm (0.04)<br>-0.55 ± 6.39<br>% (0.39)  | N = 692<br>R = 0.97<br>m = 0.94<br>-0.10 ± 0.65<br>mm (0.02)<br>-2.07 ± 6.67<br>% (0.25)  | N = 776<br>R = 0.96<br>m = 1.01<br>-2.29 ± 0.69<br>mm (0.02)<br>-24.89 ± 7.79<br>% (0.28)   | N = 37,175<br>R = 0.97<br>m = 1.24<br>-2.91 ± 1.05<br>mm (0.01)<br>-33.58 ± 9.51<br>% (0.05) | SPM (0PAL)    |
| E-AERI (0PAL) | N = 24<br>R = 0.99<br>m = 1.20<br>-0.82 ± 1.28<br>mm (0.26)<br>-10.28 ± 10.48 %<br>(2.14)   | N = 121<br>R = 0.98<br>m = 0.97<br>-0.39 ± 0.64<br>mm (0.06)<br>-3.32 ± 5.18<br>% (0.47)   |                                                                                           | N = 0                                                                                     | N = 1191<br>R = 0.99<br>m = 1.02<br>-0.55 ± 0.51<br>mm (0.01)<br>-41.66 ± 89.37 %<br>(2.59) | N = 167<br>R = 1.00<br>m = 0.99<br>-0.02 ± 0.24<br>mm (0.02)<br>-2.46 ± 5.93<br>% (0.46)  | N = 196<br>R = 1.00<br>m = 1.01<br>-0.16 ± 0.22<br>mm (0.02)<br>-6.70 ± 6.20<br>% (0.44)  |                                                                                             | N = 55<br>R = 0.90<br>m = 1.08<br>-3.94 ± 0.59<br>mm (0.08)<br>-33.49 ± 4.79<br>% (0.65)     | E-AERI (0PAL) |
| P-AERI (0PAL) | N = 263<br>R = 0.99<br>m = 1.18<br>-0.99 ± 0.86<br>mm (0.05)<br>-16.34 ± 7.44<br>% (0.46)   | N = 2804<br>R = 0.98<br>m = 1.07<br>-0.54 ± 0.66<br>mm (0.01)<br>-4.76 ± 4.95<br>% (0.09)  | N = 0                                                                                     |                                                                                           | N = 7981<br>R = 0.99<br>m = 1.09<br>-0.03 ± 0.50<br>mm (0.01)<br>3.96 ± 15.16<br>% (0.17)   | N = 113<br>R = 0.99<br>m = 0.94<br>-0.08 ± 0.24<br>mm (0.02)<br>-4.89 ± 15.33<br>% (1.44) | N = 517<br>R = 1.00<br>m = 1.01<br>-0.16 ± 0.28<br>mm (0.00)<br>-5.65 ± 6.62<br>% (0.29)  | N = 2556<br>R = 0.99<br>m = 1.11<br>-0.27 ± 0.11<br>mm (0.00)<br>-16.99 ± 5.35<br>% (0.11)  | N = 2822<br>R = 0.97<br>m = 1.29<br>-2.83 ± 1.26<br>mm (0.02)<br>-31.34 ± 8.58<br>% (0.16)   | P-AERI (0PAL) |
| MWR (0PAL)    | N = 1905<br>R = 0.99<br>m = 1.07<br>-0.64 ± 0.59<br>mm (0.01)<br>-11.53 ± 20.07<br>% (1.65) | N = 8837<br>R = 0.99<br>m = 0.96<br>0.68 ± 0.60<br>mm (0.01)<br>7.75 ± 7.32 %<br>(0.08)    | N = 1191<br>R = 0.99<br>m = 0.96<br>0.55 ± 0.51<br>mm (0.01)<br>41.66 ± 89.37<br>% (2.59) | N = 6975<br>R = 0.99<br>m = 0.91<br>0.00 ± 0.49<br>mm (0.01)<br>-4.66 ± 15.11<br>% (0.18) |                                                                                             | N = 2057<br>R = 0.99<br>m = 0.93<br>0.46 ± 0.78<br>mm (0.02)<br>17.29 ± 52.57<br>% (1.16) | N = 4343<br>R = 0.99<br>m = 0.94<br>0.22 ± 0.59<br>mm (0.01)<br>5.19 ± 100.12<br>% (1.52) | N = 2443<br>R = 0.99<br>m = 1.15<br>-0.71 ± 0.71<br>mm (0.01)<br>-19.94 ± 14.48<br>% (0.09) | N = 10,007<br>R = 0.98<br>m = 1.23<br>-1.93 ± 0.98<br>mm (0.01)<br>-25.50 ± 9.03<br>% (0.09) | MWR (0PAL)    |
| GRUAN (EWS)   | N = 10<br>R = 0.99<br>m = 0.94<br>0.21 ± 0.42<br>mm (0.13)<br>1.48 ± 9.46 %<br>(2.99)       | N = 265<br>R = 0.99<br>m = 1.05<br>-0.18 ± 0.67<br>mm (0.04)<br>0.55 ± 6.39 %<br>(0.39)    | N = 166<br>R = 1.00<br>m = 1.04<br>-0.04 ± 0.27<br>mm (0.27)<br>2.03 ± 6.16 %<br>(0.48)   | N = 113<br>R = 0.99<br>m = 1.04<br>0.08 ± 0.24<br>mm (0.02)<br>4.89 ± 15.33<br>% (1.44)   | N = 2055<br>R = 0.99<br>m = 1.09<br>-0.53 ± 0.68<br>mm (0.01)<br>-17.77 ± 52.34 %<br>(1.44) |                                                                                           | N = 2377<br>R = 1.00<br>m = 1.05<br>-0.25 ± 0.25<br>mm (0.01)<br>-4.57 ± 3.77<br>% (0.08) | N = 99<br>R = 0.98<br>m = 1.32<br>-0.27 ± 0.44<br>mm (0.04)<br>-11.46 ± 14.91<br>% (0.08)   | N = 250<br>R = 0.99<br>m = 1.36<br>-2.91 ± 1.47<br>mm (0.09)<br>-33.65 ± 8.85<br>% (0.56)    | GRUAN (EWS)   |
| RS (EWS)      | N = 64<br>R = 0.96<br>m = 0.91<br>0.70 ± 0.95<br>mm (0.12)<br>11.37 ± 13.17<br>% (1.65)     | N = 692<br>R = 0.99<br>m = 1.03<br>0.10 ± 0.65<br>mm (0.02)<br>2.07 ± 6.67 %<br>(0.25)     | N = 196<br>R = 1.00<br>m = 0.99<br>0.16 ± 0.22<br>mm (0.02)<br>6.70 ± 6.20 %<br>(0.44)    | N = 517<br>R = 1.00<br>m = 0.99<br>0.16 ± 0.28<br>mm (0.01)<br>5.65 ± 6.62 %<br>(0.29)    | N = 4278<br>R = 0.99<br>m = 1.00<br>-0.22 ± 0.59<br>mm (0.01)<br>-4.78 ± 100.01 %<br>(0.08) | N = 2377<br>R = 1.00<br>m = 0.95<br>0.25 ± 0.25<br>mm (0.01)<br>4.57 ± 3.77 %<br>(0.08)   |                                                                                           | N = 157<br>R = 0.99<br>m = 1.27<br>-0.66 ± 1.00<br>mm (0.08)<br>-10.64 ± 11.37<br>% (0.27)  | N = 1036<br>R = 0.99<br>m = 1.34<br>-2.41 ± 1.30<br>mm (0.04)<br>-29.29 ± 8.81<br>% (0.27)   | RS (EWS)      |
| E-AERI (RL)   | N = 181<br>R = 0.99<br>m = 0.93<br>0.41 ± 0.45<br>mm (0.03)<br>5.10 ± 5.06 %<br>(0.38)      | N = 786<br>R = 0.96<br>m = 0.91<br>2.29 ± 0.69<br>mm (0.02)<br>24.90 ± 7.77<br>% (0.28)    |                                                                                           | N = 2331<br>R = 0.99<br>m = 0.88<br>0.27 ± 0.10<br>mm (0.01)<br>17.09 ± 5.38<br>% (0.11)  | N = 2569<br>R = 0.99<br>m = 0.86<br>0.72 ± 0.70<br>mm (0.01)<br>19.95 ± 14.48<br>% (0.28)   | N = 99<br>R = 0.98<br>m = 0.73<br>0.27 ± 0.44<br>mm (0.04)<br>11.46 ± 14.91<br>% (1.50)   | N = 157<br>R = 0.99<br>m = 0.78<br>0.66 ± 1.00<br>mm (0.08)<br>10.64 ± 11.37<br>% (0.91)  |                                                                                             | N = 889<br>R = 0.99<br>m = 1.12<br>-0.53 ± 0.48<br>mm (0.02)<br>-6.69 ± 4.40<br>% (0.15)     | E-AERI (RL)   |
| SPM (RL)      | N = 1297<br>R = 0.99<br>m = 0.84<br>1.04 ± 0.65<br>mm (0.02)<br>15.11 ± 6.49<br>% (0.18)    | N = 37,306<br>R = 0.97<br>m = 0.76<br>2.91 ± 1.05<br>mm (0.01)<br>33.58 ± 9.51<br>% (0.05) | N = 56<br>R = 0.90<br>m = 0.75<br>3.95 ± 0.58<br>mm (0.08)<br>33.56 ± 4.77<br>% (0.64)    | N = 2617<br>R = 0.97<br>m = 0.73<br>2.86 ± 1.25<br>mm (0.02)<br>31.31 ± 8.52<br>% (0.17)  | N = 10,732<br>R = 0.98<br>m = 0.79<br>1.94 ± 0.98<br>mm (0.01)<br>25.42 ± 9.01<br>% (0.09)  | N = 250<br>R = 0.99<br>m = 0.71<br>2.91 ± 1.47<br>mm (0.09)<br>33.65 ± 8.85<br>% (0.56)   | N = 1036<br>R = 0.99<br>m = 0.72<br>2.41 ± 1.30<br>mm (0.04)<br>29.29 ± 8.81<br>% (0.27)  | N = 867<br>R = 0.99<br>m = 0.88<br>0.54 ± 0.48<br>mm (0.02)<br>6.73 ± 4.41 %<br>(0.15)      |                                                                                              | SPM (RL)      |
|               | 125HR (RL)                                                                                  | SPM (0PAL)                                                                                 | E-AERI (0PAL)                                                                             | P-AERI (0PAL)                                                                             | MWR (0PAL)                                                                                  | GRUAN (EWS)                                                                               | RS (EWS)                                                                                  | E-AERI (RL)                                                                                 | SPM (RL)                                                                                     |               |
