# Supplementary material for: Intercomparison of atmospheric water vapour measurements in theCanadian high Arctic
Source: Copernicus journal article supplement (doi:10.5194/amt-2016-330), 2016-11-22
Supplement: Supplementary file 3 [file Table S2 - Table 4 but with MUSICA v2012.pdf › Table S2 - Table 4 but with MUSICA v2012.pdf]

Table S2: Same as Table 4, but using MUSICA retrieval v2012 instead of v2015 for the 125HR dataset. Results of intercomparison of Eureka PWV measurements, including number of coincidences (N), correlation coefficient (R), slope of the correlation line (m), mean difference (X – Y) and standard deviation of the difference in mm, mean percent difference ( $2 * (X-Y)/(X+Y) * 100\%$ ) and standard deviation of the percent difference. The standard error of the mean (SE) is noted in brackets alongside the standard deviations. The x-axis instruments along the top are "X" in the difference equations; the y-axis instruments along the top are "Y" in the difference equations. Comparisons between 125HR and radiosonde and GRUAN datasets involve smoothing the radiosonde profile using MUSICA averaging kernels, and interpolation to the 125HR retrieval grid prior to integrating the total column.

|               | 125HR (RL)                                                                                  | SPM (OPAL)                                                                                 | E-AERI (OPAL)                                                                             | P-AERI (OPAL)                                                                             | MWR (OPAL)                                                                                  | GRUAN (EWS)                                                                               | RS (EWS)                                                                                  | E-AERI (RL)                                                                                 | SPM (RL)                                                                                     |               |
|---------------|---------------------------------------------------------------------------------------------|--------------------------------------------------------------------------------------------|-------------------------------------------------------------------------------------------|-------------------------------------------------------------------------------------------|---------------------------------------------------------------------------------------------|-------------------------------------------------------------------------------------------|-------------------------------------------------------------------------------------------|---------------------------------------------------------------------------------------------|----------------------------------------------------------------------------------------------|---------------|
| 125HR (RL)    |                                                                                             | N = 933<br>R = 0.97<br>m = 0.85<br>2.03 ± 0.79<br>mm (0.02)<br>24.42 ± 8.82<br>% (0.29)    | N = 5<br>R = 1.00<br>m = 0.68<br>0.09 ± 0.06<br>mm (0.03)<br>5.06 ± 2.89<br>% (1.29)      | N = 256<br>R = 0.99<br>m = 0.79<br>1.26 ± 1.02<br>mm (0.06)<br>21.94 ± 7.56<br>% (0.47)   | N = 2000<br>R = 0.99<br>m = 0.88<br>0.93 ± 0.69<br>mm (0.02)<br>17.36 ± 20.43<br>% (0.46)   | N = 10<br>R = 0.99<br>m = 1.08<br>-0.26 ± 0.45<br>mm (0.14)<br>-2.28 ± 10.20<br>% (3.22)  | N = 34<br>R = 0.99<br>m = 1.03<br>-0.21 ± 0.56<br>mm (0.10)<br>-2.52 ± 8.04<br>% (1.38)   | N = 177<br>R = 0.99<br>m = 1.01<br>-0.01 ± 0.35<br>mm (0.03)<br>0.75 ± 4.69<br>% (0.35)     | N = 1137<br>R = 0.99<br>m = 1.11<br>-0.61 ± 0.52<br>mm (0.02)<br>-8.70 ± 5.90<br>% (0.17)    | 125HR (RL)    |
| SPM (OPAL)    | N = 953<br>R = 0.97<br>m = 1.11<br>-2.02 ± 0.79<br>mm (0.08)<br>-24.44 ± 9.00 %             |                                                                                            | N = 130<br>R = 0.98<br>m = 0.97<br>0.40 ± 0.64<br>mm (0.06)<br>3.35 ± 5.16<br>% (0.45)    | N = 2662<br>R = 0.98<br>m = 0.90<br>0.54 ± 0.66<br>mm (0.01)<br>4.74 ± 4.96<br>% (0.10)   | N = 9510<br>R = 0.99<br>m = 1.01<br>-0.67 ± 0.60<br>mm (0.01)<br>-7.34 ± 7.34<br>% (0.08)   | N = 265<br>R = 0.99<br>m = 0.97<br>-0.09 ± 0.67<br>mm (0.04)<br>-1.55 ± 6.19<br>% (0.38)  | N = 660<br>R = 0.98<br>m = 0.94<br>-0.10 ± 0.65<br>mm (0.02)<br>-2.16 ± 6.71<br>% (0.26)  | N = 776<br>R = 0.96<br>m = 1.01<br>-2.29 ± 0.69<br>mm (0.02)<br>-24.88 ± 7.79 %             | N = 37,175<br>R = 0.97<br>m = 1.24<br>-2.91 ± 1.05<br>mm (0.00)<br>-33.58 ± 9.51 %           | SPM (OPAL)    |
| E-AERI (OPAL) | N = 5<br>R = 1.00<br>m = 1.46<br>-0.09 ± 0.06<br>mm (0.03)<br>-5.06 ± 2.89<br>% (1.29)      | N = 121<br>R = 0.98<br>m = 0.97<br>-0.39 ± 0.67<br>mm (0.06)<br>-3.32 ± 5.18<br>% (0.47)   |                                                                                           | N = 0                                                                                     | N = 1191<br>R = 0.99<br>m = 1.02<br>-0.55 ± 0.51<br>mm (0.01)<br>-41.66 ± 89.37 %<br>(2.59) | N = 167<br>R = 1.00<br>m = 0.99<br>-0.02 ± 0.24<br>mm (0.02)<br>-2.46 ± 5.93<br>% (0.46)  | N = 172<br>R = 1.00<br>m = 1.01<br>-0.16 ± 0.22<br>mm (0.02)<br>-6.56 ± 6.25<br>% (0.48)  |                                                                                             | N = 55<br>R = 0.90<br>m = 1.08<br>-3.94 ± 0.59<br>mm (0.08)<br>-33.49 ± 4.79 %<br>(0.64)     | E-AERI (OPAL) |
| P-AERI (OPAL) | N = 272<br>R = 0.99<br>m = 1.24<br>-1.25 ± 1.02<br>mm (0.06)<br>-21.79 ± 7.65 %             | N = 2804<br>R = 0.98<br>m = 1.07<br>-0.54 ± 0.66<br>mm (0.01)<br>-4.76 ± 4.95<br>% (0.09)  | N = 0                                                                                     |                                                                                           | N = 7981<br>R = 0.99<br>m = 1.09<br>0.03 ± 0.50<br>mm (0.01)<br>3.96 ± 15.16<br>% (0.17)    | N = 113<br>R = 0.99<br>m = 0.94<br>-0.08 ± 0.24<br>mm (0.02)<br>-4.89 ± 15.33<br>% (1.44) | N = 517<br>R = 1.00<br>m = 1.01<br>-0.16 ± 0.28<br>mm (0.01)<br>-5.65 ± 6.62<br>% (0.29)  | N = 2556<br>R = 0.99<br>m = 1.11<br>-0.27 ± 0.11<br>mm (0.00)<br>-16.99 ± 5.35 %            | N = 2822<br>R = 0.97<br>m = 1.26<br>-2.83 ± 1.26<br>mm (0.02)<br>-31.34 ± 8.58 %             | P-AERI (OPAL) |
| MWR (OPAL)    | N = 1977<br>R = 0.99<br>m = 1.12<br>-0.93 ± 0.70<br>mm (0.02)<br>-17.39 ± 20.51 %<br>(0.46) | N = 8837<br>R = 0.99<br>m = 0.96<br>0.68 ± 0.60<br>mm (0.01)<br>7.75 ± 7.32<br>% (0.08)    | N = 1191<br>R = 0.99<br>m = 0.96<br>0.55 ± 0.51<br>mm (0.01)<br>41.66 ± 89.37 %<br>(2.59) | N = 6975<br>R = 0.99<br>m = 0.91<br>0.00 ± 0.49<br>mm (0.01)<br>-4.66 ± 15.11 %<br>(0.18) |                                                                                             | N = 2057<br>R = 0.99<br>m = 0.93<br>0.46 ± 0.78<br>mm (0.02)<br>17.29 ± 52.57 %<br>(1.16) | N = 4278<br>R = 0.99<br>m = 0.94<br>0.23 ± 0.59<br>mm (0.01)<br>4.78 ± 100.01 %<br>(1.53) | N = 2443<br>R = 0.99<br>m = 1.15<br>-0.71 ± 0.71<br>mm (0.01)<br>-19.94 ± 14.48 %<br>(0.29) | N = 10,007<br>R = 0.98<br>m = 1.23<br>-1.93 ± 0.98<br>mm (0.01)<br>-25.50 ± 9.02 %<br>(0.09) | MWR (OPAL)    |
| GRUAN (EWS)   | N = 10<br>R = 0.99<br>m = 0.91<br>0.26 ± 0.45<br>mm (0.14)<br>2.28 ± 10.20<br>% (3.22)      | N = 265<br>R = 0.99<br>m = 1.00<br>0.09 ± 0.67<br>mm (0.04)<br>1.55 ± 6.19<br>% (0.38)     | N = 167<br>R = 1.00<br>m = 1.01<br>0.02 ± 0.24<br>mm (0.02)<br>2.46 ± 5.93<br>% (0.46)    | N = 113<br>R = 0.99<br>m = 1.04<br>0.08 ± 0.24<br>mm (0.02)<br>4.89 ± 15.33<br>% (1.44)   | N = 2058<br>R = 0.99<br>m = 1.05<br>-0.46 ± 0.78<br>mm (0.02)<br>-17.25 ± 52.59 %<br>(1.16) |                                                                                           | N = 2315<br>R = 1.00<br>m = 1.02<br>-0.17 ± 0.20<br>mm (0.00)<br>-3.97 ± 4.08<br>% (0.08) | N = 99<br>R = 0.98<br>m = 1.30<br>-0.27 ± 0.42<br>mm (0.04)<br>-11.43 ± 14.43 %<br>(1.50)   | N = 250<br>R = 0.98<br>m = 1.30<br>-2.65 ± 1.31<br>mm (0.07)<br>-31.72 ± 9.02 %<br>(0.57)    | GRUAN (EWS)   |
| RS (EWS)      | N = 34<br>R = 0.99<br>m = 0.94<br>0.21 ± 0.57<br>mm (0.10)<br>2.48 ± 8.15<br>% (1.40)       | N = 660<br>R = 0.98<br>m = 1.03<br>0.10 ± 0.65<br>mm (0.02)<br>2.16 ± 6.71<br>% (0.26)     | N = 172<br>R = 1.00<br>m = 0.99<br>0.16 ± 0.22<br>mm (0.02)<br>6.56 ± 6.24<br>% (0.48)    | N = 517<br>R = 1.00<br>m = 0.99<br>0.16 ± 0.28<br>mm (0.01)<br>5.65 ± 6.62<br>% (0.29)    | N = 4278<br>R = 0.99<br>m = 1.00<br>-0.22 ± 0.59<br>mm (0.01)<br>-4.78 ± 100.01 %<br>(1.53) | N = 2315<br>R = 1.00<br>m = 0.98<br>0.17 ± 0.20<br>mm (0.00)<br>3.97 ± 4.08<br>% (0.08)   |                                                                                           | N = 157<br>R = 0.99<br>m = 1.27<br>-0.66 ± 1.00<br>mm (0.08)<br>-10.64 ± 11.37 %<br>(0.91)  | N = 742<br>R = 0.98<br>m = 1.33<br>-2.35 ± 1.29<br>mm (0.05)<br>-28.62 ± 8.88 %<br>(0.32)    | RS (EWS)      |
| E-AERI (RL)   | N = 182<br>R = 0.99<br>m = 0.98<br>0.01 ± 0.35<br>mm (0.02)<br>-0.79 ± 4.67<br>% (0.35)     | N = 786<br>R = 0.96<br>m = 0.91<br>2.29 ± 0.69<br>mm (0.02)<br>24.90 ± 7.77<br>% (0.28)    |                                                                                           | N = 2331<br>R = 0.98<br>m = 0.88<br>0.27 ± 0.10<br>mm (0.00)<br>17.09 ± 5.38<br>% (0.11)  | N = 2569<br>R = 0.99<br>m = 0.86<br>0.72 ± 0.70<br>mm (0.01)<br>19.95 ± 14.48<br>% (0.28)   | N = 99<br>R = 0.98<br>m = 0.74<br>0.27 ± 0.42<br>mm (0.04)<br>11.43 ± 14.88 %             | N = 157<br>R = 0.99<br>m = 0.78<br>0.66 ± 1.00<br>mm (0.08)<br>10.64 ± 11.37 %            |                                                                                             | N = 889<br>R = 0.99<br>m = 1.12<br>-0.53 ± 0.48<br>mm (0.02)<br>-6.68 ± 4.40<br>% (0.15)     | E-AERI (RL)   |
| SPM (RL)      | N = 1152<br>R = 0.99<br>m = 0.88<br>0.60 ± 0.55<br>mm (0.02)<br>8.65 ± 6.19<br>% (0.18)     | N = 37,306<br>R = 0.97<br>m = 0.76<br>2.91 ± 1.05<br>mm (0.02)<br>33.57 ± 9.51<br>% (0.05) | N = 56<br>R = 0.90<br>m = 0.75<br>3.95 ± 0.58<br>mm (0.08)<br>33.56 ± 4.77<br>% (0.64)    | N = 2617<br>R = 0.97<br>m = 0.73<br>2.86 ± 1.25<br>mm (0.02)<br>31.31 ± 8.52<br>% (0.17)  | N = 10,732<br>R = 0.98<br>m = 0.79<br>1.94 ± 0.98<br>mm (0.01)<br>25.42 ± 9.01<br>% (0.09)  | N = 250<br>R = 0.98<br>m = 0.74<br>2.65 ± 1.31<br>mm (0.08)<br>31.72 ± 9.02<br>% (0.57)   | N = 742<br>R = 0.98<br>m = 0.73<br>2.35 ± 1.29<br>mm (0.05)<br>28.62 ± 8.88<br>% (0.32)   | N = 867<br>R = 0.99<br>m = 0.88<br>0.54 ± 0.48<br>mm (0.02)<br>6.73 ± 4.41<br>% (0.15)      |                                                                                              | SPM (RL)      |
|               | 125HR (RL)                                                                                  | SPM (OPAL)                                                                                 | E-AERI (OPAL)                                                                             | P-AERI (OPAL)                                                                             | MWR (OPAL)                                                                                  | GRUAN (EWS)                                                                               | RS (EWS)                                                                                  | E-AERI (RL)                                                                                 | SPM (RL)                                                                                     |               |
